# Supplementary material for: Molecularly-tunable nanoelectrode arrays created by harnessing intermolecular interactions
Source: Chem Sci. 2021 Mar 10;12(17):6081–90. doi: 10.1039/d0sc06955h (PMC8098684; doi:10.1039/d0sc06955h)
Supplement: SC-012-D0SC06955H-s001 [file SC-012-D0SC06955H-s001.pdf]

Electronic Supplemental Information

# Molecularly-Tunable Nanoelectrode Arrays Created by Harnessing Intermolecular Interactions

Han-Wen Cheng<sup>a,b\*</sup>, Shan Wang<sup>b</sup>, Marc D. Porter<sup>c\*</sup>, and Chuan-Jian Zhong<sup>b\*</sup>

<sup>a)</sup> School of Chemical and Environmental Engineering, Shanghai Institute of Technology, Shanghai 201418, China

<sup>b)</sup> Department of Chemistry, State University of New York at Binghamton, Binghamton, New York 13902, USA

<sup>c)</sup> Department of Chemistry and Chemical Engineering, University of Utah, Salt Lake City, Utah 84112, USA

## Additional experimental data and data analysis:

**Table S1** Summary of the binding strength estimated based on density functional theory (DFT)-calculated  $E_b^*$ <sup>[1,2]</sup> for the selected thiolate molecules ( $\text{CH}_3(\text{CH}_2)_{n-1}\text{SH}$ ) on gold surfaces.

| Thiolate molecules | $E_b^*$ (eV) |                                                                                                     |
|--------------------|--------------|-----------------------------------------------------------------------------------------------------|
| FTP                | -3.43        | Linear extrapolation based on “electronegativity vs. $E^*$ ” ( $E_b = -0.6449 \times n - 0.8533$ )  |
| MHA                | -4.39        |                                                                                                     |
| MBA                | -2.56        | Linear regression based on Ref. <sup>[1]</sup> ( $E_b = -0.1043 \times n - 2.6286$ )                |
| TP                 | -2.20        |                                                                                                     |
| ET                 | -2.61        | Ref. <sup>[2]</sup>                                                                                 |
| MUA                | -3.48        | Ref. <sup>[2]</sup>                                                                                 |
| HDT                | -4.0392      | Linear regression based on Ref. <sup>[1]</sup> ( $E_b = -0.1063 \times n - 2.3384$ ) <sup>[2]</sup> |

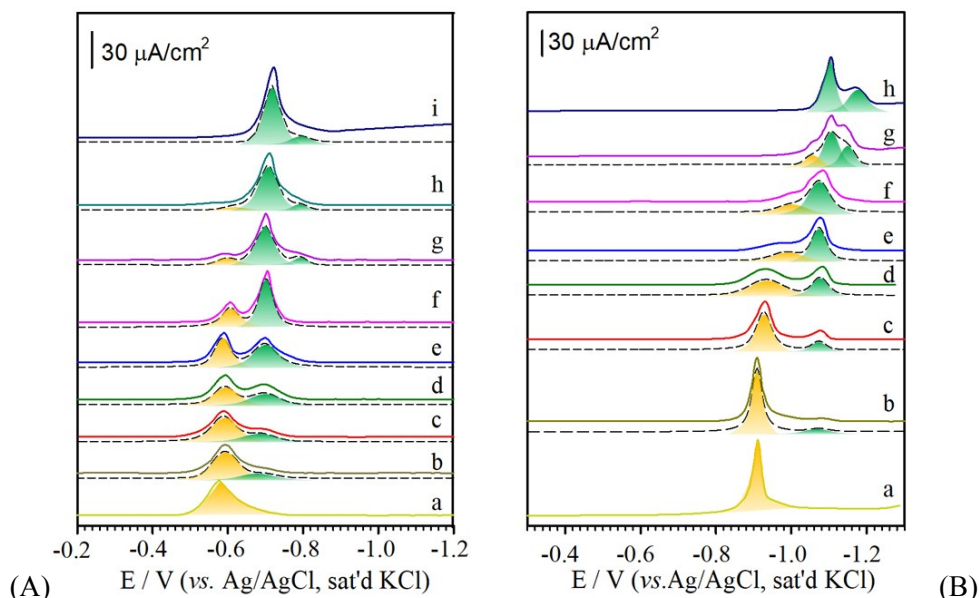

**Fig. S1** Voltammetric curves (dashed and colored curves represent deconvoluted waves). (A) TP/ET: (a) TP ( $E_p = -0.58$  V). (b), (c), (d), (e), (f), (g), and (h) TP/ET (mixing ratios: 30, 15, 10, 5, 2, 0.5, and 0.1 with a total thiol concentration of 5.0 mM.  $E_p$ : -0.59 and -0.69 V (b); -0.59 and -0.69 V (c); -0.59 and -0.70 V (d); -0.60 and -0.70 V (e); -0.61 and -0.70 V (f); -0.61, -0.70 and -0.78 V (g) and -0.61, -0.71 and -0.78 V (h)). (i) ET ( $E_p = -0.72$  and -0.78 V). The more negative potential wave corresponds to the monolayer of ET (-0.72 V) which has a narrower width (45 mV) than those for the TP-derived monolayer (-0.58 V, 85 mV) reflects a difference in adsorbate-adsorbate interaction. (B) MUA/HDT: (a) MUA ( $E_p = -0.89$  V). (b), (c), (d), (e), (f), and (g) MUA/HDT (mixing ratios: 18.0, 9.0, 6.0, 3.5, 2.0, and 1.0 with a total thiol concentration of 2.5 mM.  $E_p$ : -0.91 V and -1.08 V (b), -0.94 and -1.08 V (c), -0.94 and -1.09 V (d), -0.96 and -1.08 V (e), -0.99, and -1.08 (f), -1.05 V, -1.10 and -1.14 V (g)). (h) HDT ( $E_p$ : -1.11 and -1.17 V). (Electrolyte: 0.5 M KOH, Geometric surface area of electrode: 0.6

cm<sup>2</sup>, scan rate: 50 mV/sec). In comparison with the single wave characteristic at the less negative potential ( $E_p = -0.89$  V) for MUA monolayer, HDT monolayer features a double-wave character at the more negative potential (h), -1.11 V and -1.17 V, which is consistent with earlier finding<sup>[3]</sup> on the voltammetric desorption potentials as a function of the number of carbons ( $n$ ) in the alkyl chain.

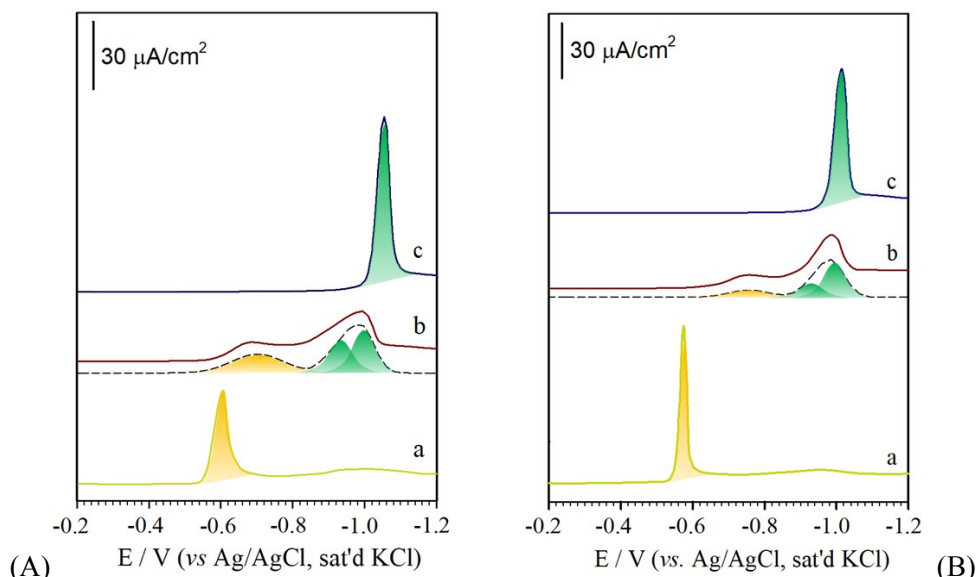

**Fig. S2** Voltammetric curves: (A) (a) FTP ( $E_p$  (FTP) = -0.60 V), (b) FTP/MHA (FTP/MHA mixing ratio: 25 with a total thiol concentration of 3.5 mM ( $E_p$  (FTP) = -0.68 V and  $E_p$  (MHA) = -1.0 V)), and (c) MHA ( $E_p$  (MHA) = -1.06 V). (B) (a) MBA ( $E_p$  (MBA) = -0.57 V), (b) MBA/MHA (MBA/MHA mixing ratio: 20 and a total thiol concentration of 3.4 mM ( $E_p$  (MBA) = -0.78 V and  $E_p$  (MHA) = -0.99 V)), and (c) MHA ( $E_p$  (MHA) = -1.06 V). (Electrolyte: 0.5 M KOH, Geometric surface area of the electrode: 0.6 cm<sup>2</sup>, and Scan rate: 50 mV/sec).

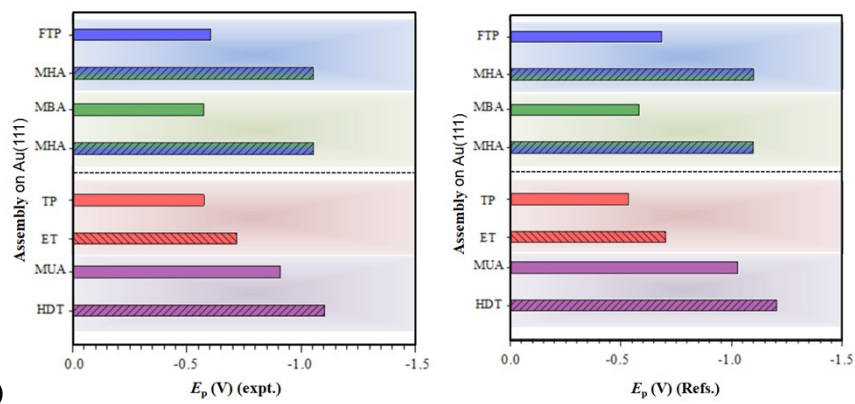

**Fig. S3** (A) Plot of the reductive desorption potentials ( $E_p$ ) obtained from the experiments for the different pairs of molecules studied in this work. ( $E_{p(Ag/AgCl)}$ ). (B) Reductive desorption potentials ( $E_p$ ) estimated based on literature reports for different thiolate molecules on gold surfaces: FTP's  $E_{p(SCE)} = -0.73$  V (based on fitting<sup>[2]</sup>); MHA's  $E_{p(SCE)} = -1.15$  V (based on fitting<sup>[2]</sup>); MBA's  $E_{p(SCE)} = -0.63$  V<sup>[4]</sup>; TP's  $E_{p(SCE)} = -0.58$  V<sup>[5]</sup>; ET's  $E_{p(SCE)} = -0.75$  V<sup>[6]</sup>; MUA's  $E_{p(SCE)} = -1.08$  V (based on fitting<sup>[2]</sup>); and HDT's  $E_{p(SCE)} = -1.25$  eV (based on fitting<sup>[2]</sup>). Note that the potential is given in  $E_{p(Ag/AgCl)}$ , which is -0.05 V with respect to  $E_{p(SCE)}$ .

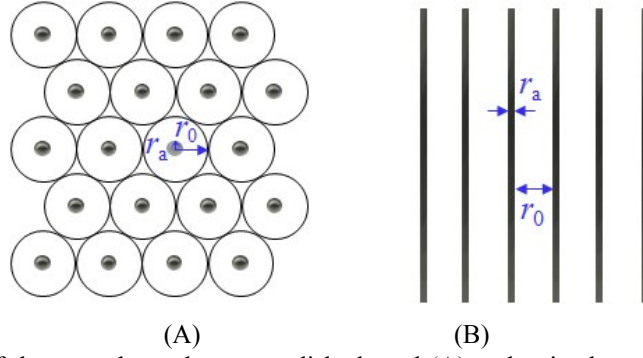

**Scheme S1.** Simulation models of the nanoelectrode arrays: disk-shaped (A) and strip-shaped (B) models. Simulation of nanoelectrode array is based on the dimensionless equation of current ( $i$ )  $\sim$  potential ( $E$ ) derived by Amatore *et al.*<sup>[7]</sup>:

For disk-type:

$$r_a = r_0(1 - \theta)^{1/2} \quad (1)$$

For stripe-type:

$$r_a = r_0(1 - \theta) \quad (2)$$

Dimensionless equation of current  $\sim$  potential:

$$\Psi = \Lambda(1 - \theta) \exp(\alpha\xi) \left\{ [1 - \Lambda\Psi - 2r\Psi f(1 - \theta)] - [\Lambda\Psi + 2r\Psi f(1 - \theta)] \exp(-\xi) \right\} \quad (3)$$

where

$$r = r_a \left( \frac{DRT}{Fv} \right)^{-1/2} \quad (4)$$

$$\Lambda = k_0 \left( \frac{RT}{DFv} \right)^{1/2} \quad (5)$$

$$\xi = -\frac{F}{RT}(E - E^0) \quad (6)$$

$$\tau = \frac{F}{RT} vt \quad (7)$$

$$\Psi = \frac{i}{FAC^0 \left( \frac{DFv}{RT} \right)^{1/2}} \quad (8)$$

$$\Lambda\Psi = \frac{1}{\sqrt{\pi}} \int_0^\tau \frac{\Psi}{(\tau - \eta)^{1/2}} d\eta \quad (9)$$

The  $f(1 - \theta)$  function is

$$f(1 - \theta) = 0.3(1 - \theta)^{-1/2} \text{ for disk-type} \quad (10)$$

and

$$f(1 - \theta) = 1 - \frac{1}{\sqrt{\pi}} \ln \left[ \frac{\pi}{2} \sin(1 - \theta) \right] \text{ for stripe-type} \quad (11)$$

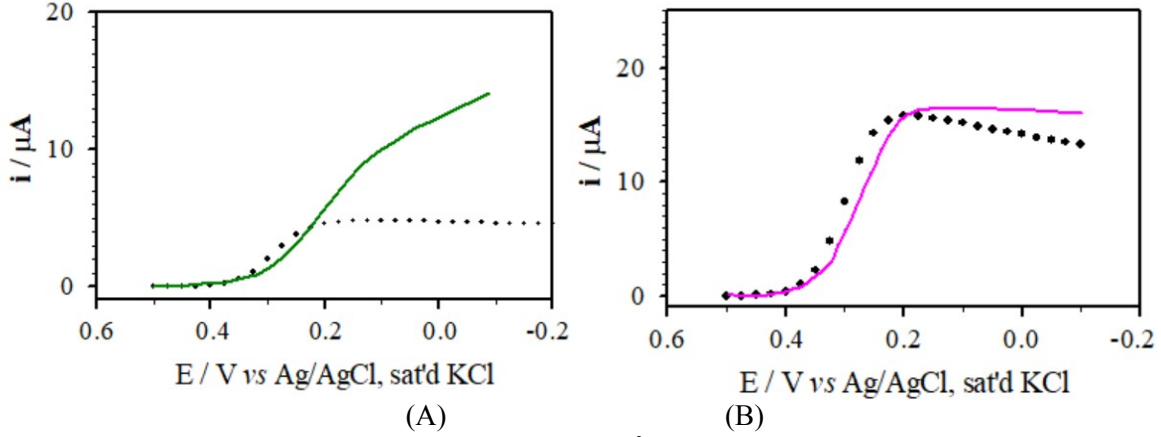

**Fig. S4** Theoretical modeling results for the reduction of  $\text{Fe}(\text{CN})_6^{3-}$  on the perforated MUA/HDT (A) and MBA/MHA (B). (A) The comparison of experimental data (lines) from Fig. 4A (c) with the simulation (points) in strip-model using  $r_a = 1.23$  nm,  $R_0 = 2.05 \times 10^4$  nm ( $1-\theta = 6.0 \times 10^{-5}$ ),  $D = 1.12 \times 10^{-6}$  cm<sup>2</sup>/s, and  $k = 2$ . (B) The comparison of experimental data (lines) from Fig. 4A (d) with the simulation (points) in strip-model using  $r_a = 2.74$  nm,  $R_0 = 6.09 \times 10^3$  nm ( $1-\theta = 5.0 \times 10^{-4}$ ),  $D = 1.12 \times 10^{-6}$  cm<sup>2</sup>/s, and  $k = 2$ .

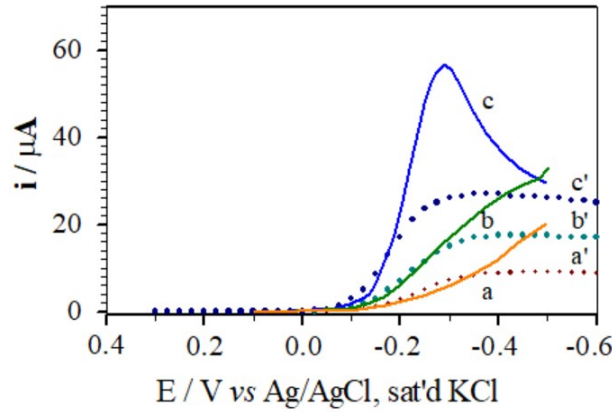

**Fig. S5** Theoretical modeling results for reduction of  $\text{Ru}(\text{NH}_3)_6^{3+}$  at three different pH values on the perforated MBA/MHA system. The comparison of experimental data (lines: a, b, and c) from (Fig. 4B (b-d)) with the simulation (points: a', b', and c') in strip-model using  $r_a = 0.5$  nm,  $R_0 = 5.57 \times 10^4$  nm ( $1-\theta = 8.0 \times 10^{-1}$ ),  $D = 7.5 \times 10^{-6}$  cm<sup>2</sup>/s, and  $k = 2$  for pH~3.4 (a);  $r_a = 0.9$  nm,  $R_0 = 3.75 \times 10^4$  nm ( $1-\theta = 2.5 \times 10^{-5}$ ),  $D = 1.1 \times 10^{-5}$  cm<sup>2</sup>/s, and  $k = 2$  for pH~6.0 (b); and  $r_a = 0.4$  nm,  $R_0 = 3.75 \times 10^4$  nm ( $1-\theta = 1.03 \times 10^{-4}$ ),  $D = 1.7 \times 10^{-5}$  cm<sup>2</sup>/s, and  $k = 2$  for pH~10.3 (c).

**Table S2.** Summary of parameters for nanoelectrode array simulation (disk-model Fig. 4D-E).

|                                       | Perforated Film | $r_a$ (nm) | $R_0$ (nm) | $1-\theta$            | $i_{\text{theory}} (\mu\text{A})$ | $i_{\text{simulated}} (\mu\text{A})$ | $N_\mu$            |
|---------------------------------------|-----------------|------------|------------|-----------------------|-----------------------------------|--------------------------------------|--------------------|
| (i) $\text{Fe}(\text{CN})_6^{3-}$     | MUA/HDT         | 2          | 482        | $8.62 \times 10^{-6}$ | $3.21 \times 10^{-7}$             | $3.08 \times 10^{-7}$                | $4.39 \times 10^7$ |
| (ii) $\text{Fe}(\text{CN})_6^{3-}$    | MBA/MHA         | 20         | 1950       | $1.05 \times 10^{-4}$ | $3.21 \times 10^{-6}$             | $3.07 \times 10^{-6}$                | $5.35 \times 10^6$ |
| (iii) $\text{Ru}(\text{NH}_3)_6^{3+}$ | MBA/MHA         | 7.5        | 2160       | $1.21 \times 10^{-5}$ | $7.53 \times 10^{-6}$             | $5.71 \times 10^{-6}$                | $4.38 \times 10^6$ |

Note: Data for i, ii and iii are the data from Fig. 4D (a), 4D (b) and 4E (b).  $i_{\text{theory}} = 4nFDC^0 r_a$ ;  $i_{\text{simulated}} = I_{\text{lim}} / \#N$  where  $N_\mu = A_{\text{total}}/A_{\text{singl}} = A_T/\pi R_0^2 = A_T(1-\theta)/\pi r_a^2$ ,  $A_T = 0.64$  cm<sup>2</sup>. (see Fig. S6 for single nanoelectrode limiting current.)

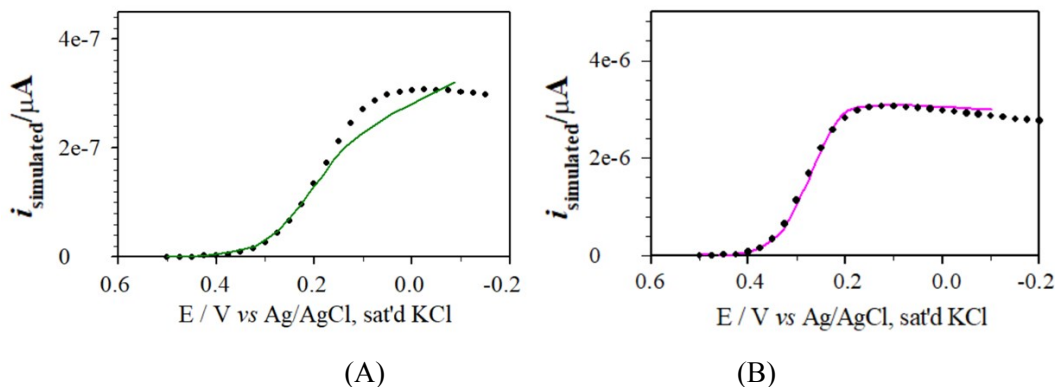

**Fig. S6** Comparison between the experimental (line) and simulated (point, disk-model) steady state limiting current based on eqn. 5. (A) Perforated MUA/HDT, (B) perforated MBA/MHA monolayer (Electrolyte: 1 M KCL with 1.3 mM  $\text{Fe}(\text{CN})_6^{3-}$ ).

#### References:

1. D. Nassoko, M. Seydou, C. Goldmann, C. Chanéac, C. Sanchez, D. Portehault, F. Tielens. Rationalizing the formation of binary mixed thiol self-assembled monolayers, *Mater. Tod. Chem.*, 2017, **5**, 34-42.
2. R. C. Salvarezza, P. Carro. The electrochemical stability of thiols on gold surfaces. *J. Electroanal. Chem.*, 2018, **819**, 234–239.
3. C. J. Zhong, M. D. Porter, The fine structures of voltammetric curves for the electrochemical desorption of organosulfur-based monolayers at gold, *J. Electroanal. Chem.*, 1997, **425**, 147.
4. M. C. R. González, A. G. I. Orive, P. Carro, R. C. Salvarezza, C. Ahn, Structure and electronic and charge-transfer properties of mercaptobenzoic acid and mercaptobenzoic acid–undecanethiol mixed monolayers on Au (111), *J. Phys. Chem.* 2014, **118**, 30013–30022.
5. H. Kang, J. Noh, Influence of thiol molecular backbone structure on the formation and reductive desorption of self-assembled aromatic and alicyclic thiol monolayers on Au(111) surface, *Bull. Kor. Chem. Soc.* 2013, **34**, 1383–1387.
6. S. Imabayashi, M. Iida, D. Hobara, Z. Q. Feng, K. Niki, T. Kakiuchi, Reductive desorption of carboxylic-acid-terminated alkanethiol monolayers from Au(111) surfaces, *J. Electroanal. Chem.* 1997, **428**, 33–38.
7. C. Amatore, J. M. Saveant, D. Tessier, Charge transfer at partially blocked surfaces: A model for the case of microscopic active and inactive sites, *J. Electroanal. Chem.*, 1983, **147**, 39-51.
